# Supplementary material for: FSL-CP: a benchmark for small molecule activity few-shot prediction using cell microscopy images
Source: Royal Society of Chemistry journal article supplement (doi:10.1039/d3dd00205e), 2024-01-01
Supplement: d3dd00205e1.pdf [file d3dd00205e1.pdf]

# Supplementary Information

## FSL-CP: A Benchmark for Small Molecule Activity Few-Shot Prediction using Cell Microscopy Images

Son V. Ha, Lucas Leuschner, and Paul Czodrowski\*

*Department of Chemistry, Johannes Gutenberg University Mainz, Germany*

E-mail: czodpaul@uni-mainz.de, ORCID:0000-0002-7390-879

### List of Figures

- 1 **Sample Cell Painting images from file 24294-I23-2.npz.** Each of these image are from the same view, but with different dyes: a)Mito, b)Ph.Golgi, c)Hoechst, d)ERSytoBleed, e)ERSyto. For modelling, we stack these 5 views to create one 5-channel image. . . . . 9
- 2 **What are the target types of the tasks in the dataset?** The majority are single proteins and cell lines, both in the entire set of tasks and the test tasks only. . . . . 10
- 3 **Result reported using dAUPRC.** Figure A): Mean dAUPRC on test tasks as support set size increases. Figure B): Distribution of dAUPRC across all test tasks at support set size 64. Figure C): Mean dAUPRC of selected models for each task across all support set sizes. . . . . 11

|   |                                                                                                                                                                                                                                                                                                                                          |    |
|---|------------------------------------------------------------------------------------------------------------------------------------------------------------------------------------------------------------------------------------------------------------------------------------------------------------------------------------------|----|
| 4 | <b>Result reported using Balanced Accuracy (BAcc).</b> Figure A): Mean BAcc on test tasks as support set size increases. Figure B): Distribution of BAcc across all test tasks at support set size 64. Figure C): Mean BAcc of selected models for each task across all support set sizes. . . . .                                       | 12 |
| 5 | <b>Result reported using Cohens Kappa.</b> Figure A): Mean Cohens Kappa on test tasks as support set size increases. Figure B): Distribution of Cohens Kappa across all test tasks at support set size 64. Figure C): Mean Cohens Kappa of selected models for each task across all support set sizes. . . . .                           | 13 |
| 6 | <b>Result reported using F1 Score.</b> Figure A): Mean F1 score on test tasks as support set size increases. Figure B): Distribution of F1 score across all test tasks at support set size 64. Figure C): Mean F1 score of selected models for each task across all support set sizes. . . . .                                           | 14 |
| 7 | <b>Figure 1: Heatmap of Jaccard Index between the unique InChiKeys of 18 tasks in D_test.</b> The majority of tasks share very few common InChiKeys. Outliers are tasks 737826, 737824_1 and 737825 whose targets resemble Cytochrome P450. But we believe they are still different enough to be separate tasks in the test set. . . . . | 15 |

## List of Tables

|   |                                                                                       |   |
|---|---------------------------------------------------------------------------------------|---|
| 1 | <b>Test tasks:</b> Details of the assays in the test set and their targets in ChEMBL. | 8 |
|---|---------------------------------------------------------------------------------------|---|

This document provides supplementary information for the publication “FSL-CP: A Benchmark for Small Molecule Activity Few-Shot Prediction using Cell Microscopy Images”. We report details about the 201 tasks of the dataset, and additional performance metrics.

The dataset, model codes and performances of all models (including those not reported in the publication) are all publicly available on Github:

[https://github.com/czodrowskilab/FSL\\_CP](https://github.com/czodrowskilab/FSL_CP).

## Model Hyperparameters

Here we include more details about the hyperparameters of benchmark models. If the reader wants to reproduce the result of the paper, we would encourage running the codes from our GitHub repository.

### **protonet\_cp+:**

num\_episodes\_train = 50000

num\_episodes\_val = 100

loss function: *nn.CrossEntropyLoss()*

optimizer: *optim.Adam(model.parameters(), lr = 0.0001)*

learning rate scheduler: *StepLR(optimizer, step\_size = 20000, gamma = 0.1)*

Backbone model: 3-hidden-layer Fully-connected Neural Network

Size of output layer of backbone model = 256

Distance = 'Euclidean'

### **protonet\_cp:**

num\_episodes\_train = 50000

num\_episodes\_val = 100

loss function: *nn.CrossEntropyLoss()*

optimizer: *optim.Adam(model.parameters(), lr = 0.0001)*

learning rate scheduler: *StepLR(optimizer, gamma = 0.1)*

Backbone model: 3-hidden-layer Fully-connected Neural Network

Size of output layer of backbone model = 512

Distance = 'Euclidean'

### **protonet\_img:**

num\_episodes\_train = 30000

num\_episodes\_val = 100

loss function: *nn.CrossEntropyLoss()*

optimizer: *optim.Adam(model.parameters(), weight\_decay = 1e - 4)*

learning rate scheduler: *StepLR(optimizer, step\_size = 10000, gamma = 0.1)*

Image transformation: *RandomCrop(300), Resize(200)*

Backbone model: ResNet50

Size of output layer of backbone model = 1600

Distance = 'CosineSimilarity'

### **maml\_cp+:**

num\_episodes\_train = 32000

num\_episodes\_val = 100

adaptation\_steps=3

loss function: *nn.BCEWithLogitsLoss()*

optimizer: *optim.Adam(lr = 0.001)*

Image transformation: *RandomCrop(100), Resize(85)*

Model: ResNet50

MAML Fast adaptation learning rate = 0.01

### **maml\_img:**

num\_episodes\_train = 32000

num\_episodes\_val = 100

adaptation\_steps=3

loss function: *nn.BCEWithLogitsLoss()*

optimizer: *optim.Adam(lr = 0.001)*

Model: 3-hidden-layer Fully-connected Neural Network

MAML Fast adaptation learning rate = 0.01

**singletask\_cp:**

max\_epochs = 50

loss function: *nn.BCEWithLogitsLoss()*

optimizer: *optim.Adam(lr = 0.0001)*

learning rate scheduler: *StepLR(optimizer, step\_size = 100, gamma = 0.1)*

Model: 3-hidden-layer Fully-connected Neural Network

**multitask\_cp:**

pretrain max\_epochs = 50

pretrain loss function: *multitask\_bce* (Binary Cross Entropy)

pretrain optimizer: *optim.SGD(lr = 1e - 2, momentum = 0.9, weight\_decay = 1e - 4)*

pretrain learning rate scheduler: *StepLR(optimizer, step\_size = 20, gamma = 0.1)*

Model: 3-hidden-layer Fully-connected Neural Network

inference max\_epochs = 50

inference loss function: *nn.BCEWithLogitsLoss()*

inference optimizer: *optim.Adam(lr = 0.0001)*

inference learning rate scheduler: *StepLR(optimizer, step\_size = 100, gamma = 0.1)*

**logistic\_cp+:**

We did a RandomizedSearchCV on these hyperparameters:

'C' : [0.01, 0.1, 1.0, 10.0, 100.0]

## Test Tasks Similarity

In this section, we include some statistics about the similarity between 18 test tasks.

In Figure 7, we measured the Jaccard Index for the unique InChiKeys from every task pair in D\_test. We observed that the majority of tasks shares very few common InChiKeys. Exceptions are tasks 737826, 737824\_1 and 737825 whose targets resemble Cytochrome P450.

Taking a closer look at these three tasks 737826, 737824\_1 and 737825, they have 800, 840 and 779 unique InChiKeys, respectively. 2 datapoints from 2 tasks is similar if they have the same (InChiKey, labels) pair. Tasks (737826 and 737824\_1) have 580 (InChiKey, labels) pair in common. For tasks (737826, 737825) and (737824\_1, 737825) the number is 450 and 469. So around 60%-70% of the (InChiKeys, labels) pair is similar between these tasks.

In simpler words, these 3 tasks are 60%-70% 'similar' to each other. In our opinion, they are still different enough to be different tasks in the test set. However, we acknowledge that future data curation effort should take notice of similar tasks like this.

Table 1: **Test tasks:** Details of the assays in the test set and their targets in ChEMBL.

| TASK_ID  | assay_chembl_id | target_chembl_id | target_type    |
|----------|-----------------|------------------|----------------|
| 688267   | CHEMBL1614530   | CHEMBL2026       | SINGLE PROTEIN |
| 600886   | CHEMBL1040692   | CHEMBL364        | ORGANISM       |
| 737826   | CHEMBL1741325   | CHEMBL3397       | SINGLE PROTEIN |
| 737824_1 | CHEMBL1741323   | CHEMBL3622       | SINGLE PROTEIN |
| 737825   | CHEMBL1741324   | CHEMBL340        | SINGLE PROTEIN |
| 1495405  | CHEMBL3562136   | CHEMBL612545     | UNCHECKED      |
| 737053   | CHEMBL1738598   | CHEMBL612545     | UNCHECKED      |
| 737400   | CHEMBL1738606   | CHEMBL5501       | SINGLE PROTEIN |
| 736947   | CHEMBL1738312   | CHEMBL1741220    | SINGLE PROTEIN |
| 752347   | CHEMBL1794311   | CHEMBL1977       | SINGLE PROTEIN |
| 752496   | CHEMBL1794486   | CHEMBL5027       | SINGLE PROTEIN |
| 752509   | CHEMBL1794499   | CHEMBL1795091    | SINGLE PROTEIN |
| 752594   | CHEMBL1794584   | CHEMBL1293258    | SINGLE PROTEIN |
| 809095   | CHEMBL1964081   | CHEMBL2007624    | SINGLE PROTEIN |
| 845173   | CHEMBL2114784   | CHEMBL1795085    | SINGLE PROTEIN |
| 845196   | CHEMBL2114807   | CHEMBL5990       | SINGLE PROTEIN |
| 954338   | CHEMBL2354287   | CHEMBL2362981    | SINGLE PROTEIN |
| 845206   | CHEMBL2114817   | CHEMBL4377       | SINGLE PROTEIN |



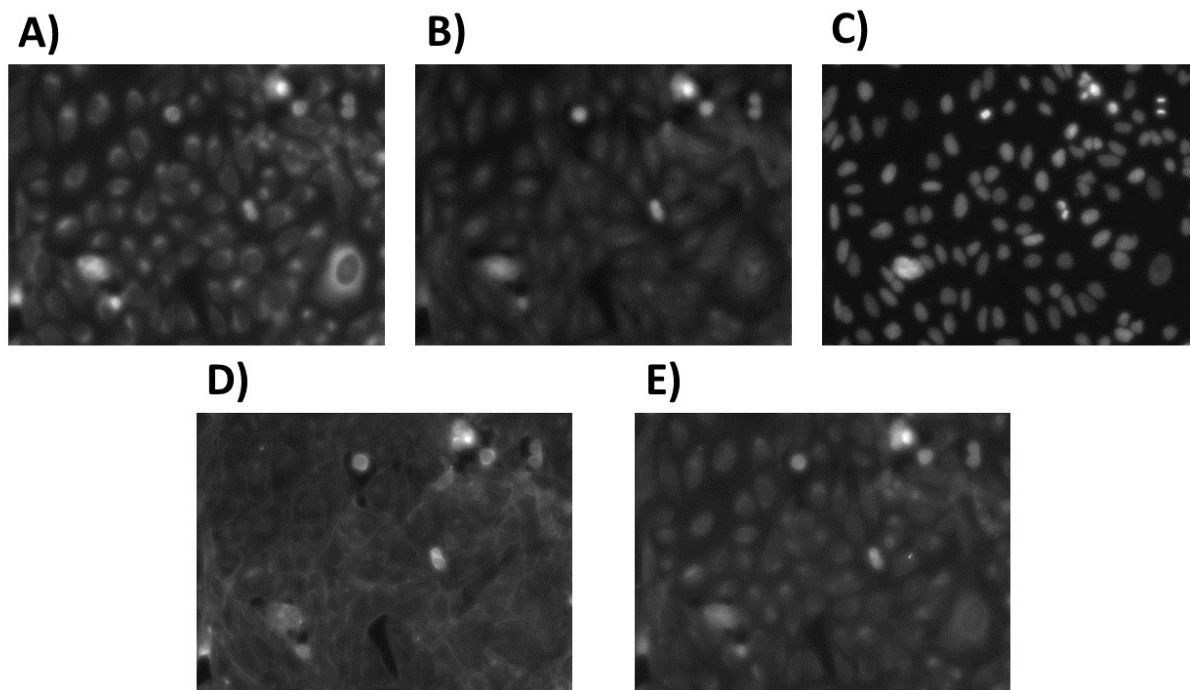

Figure 1: **Sample Cell Painting images from file 24294-I23-2.npz.** Each of these image are from the same view, but with different dyes: a)Mito, b)Ph.Golgi, c)Hoechst, d)ERSytoBleed, e)ERSyto. For modelling, we stack these 5 views to create one 5-channel image.

What are the target types of the tasks in the dataset?

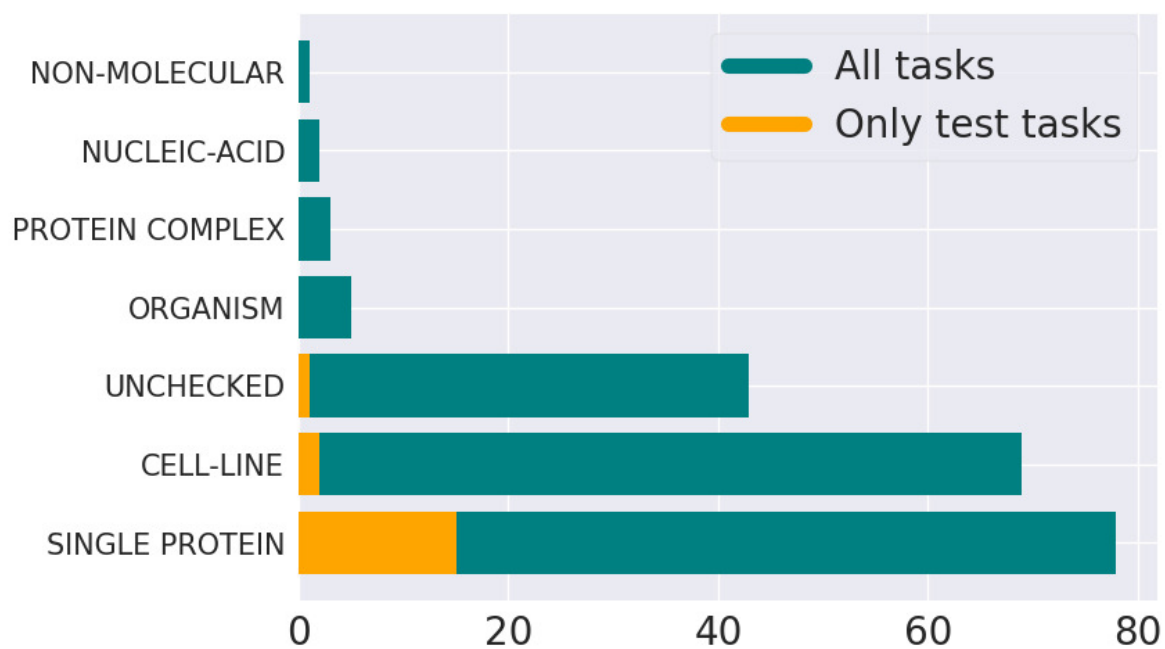

Figure 2: **What are the target types of the tasks in the dataset?** The majority are single proteins and cell lines, both in the entire set of tasks and the test tasks only.

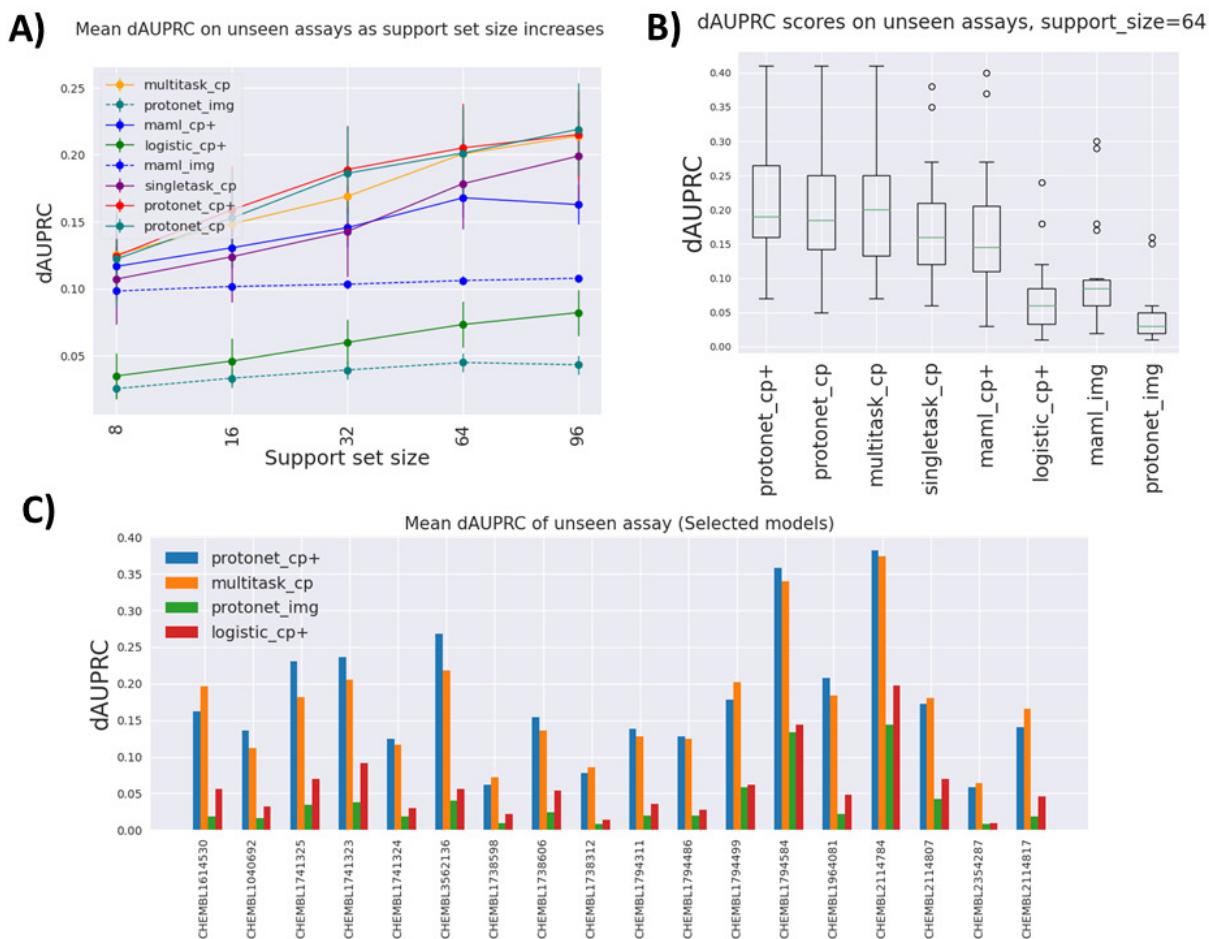

Figure 3: **Result reported using dAUPRC.** Figure A): Mean dAUPRC on test tasks as support set size increases. Figure B): Distribution of dAUPRC across all test tasks at support set size 64. Figure C): Mean dAUPRC of selected models for each task across all support set sizes.

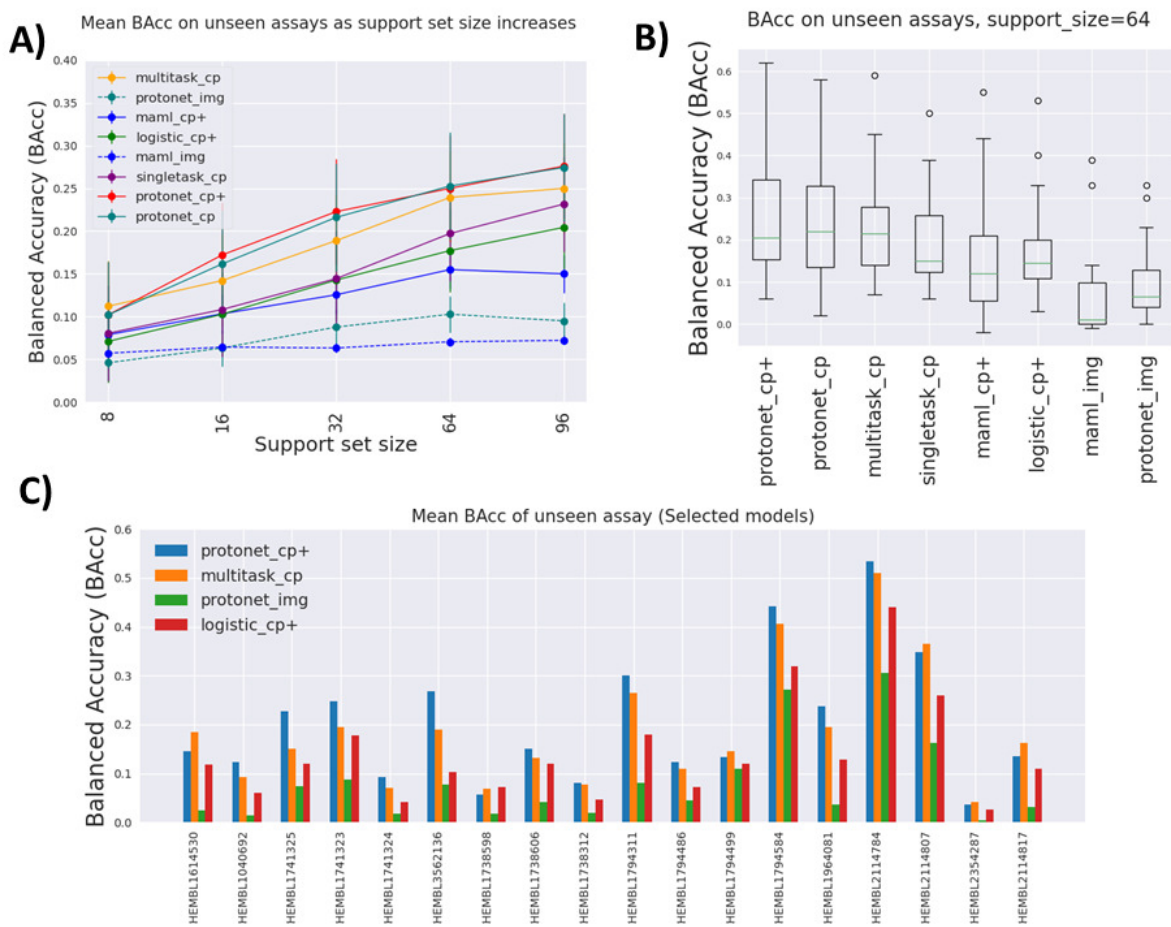

Figure 4: **Result reported using Balanced Accuracy (BAcc).** Figure A): Mean BAcc on test tasks as support set size increases. Figure B): Distribution of BAcc across all test tasks at support set size 64. Figure C): Mean BAcc of selected models for each task across all support set sizes.

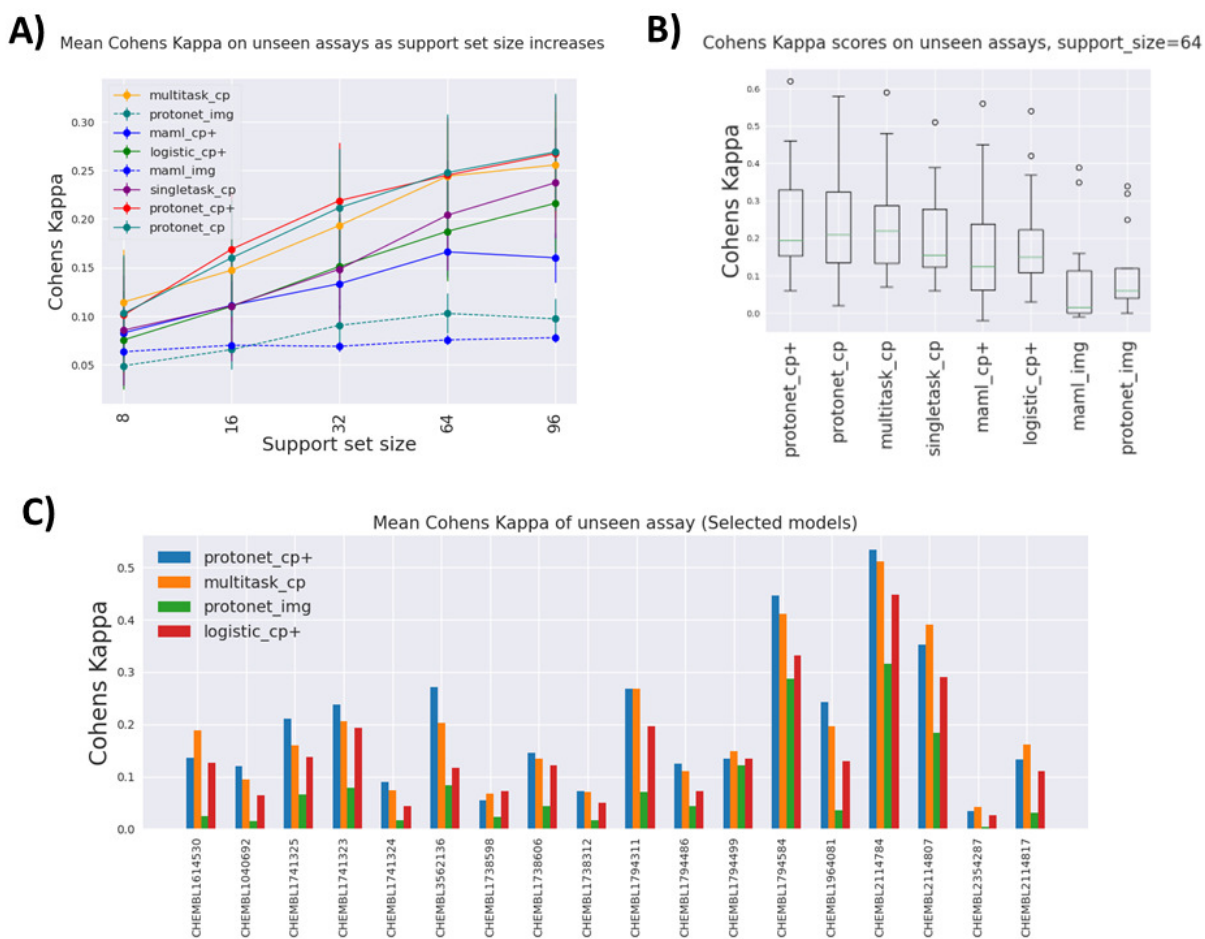

Figure 5: **Result reported using Cohens Kappa.** Figure A): Mean Cohens Kappa on test tasks as support set size increases. Figure B): Distribution of Cohens Kappa across all test tasks at support set size 64. Figure C): Mean Cohens Kappa of selected models for each task across all support set sizes.

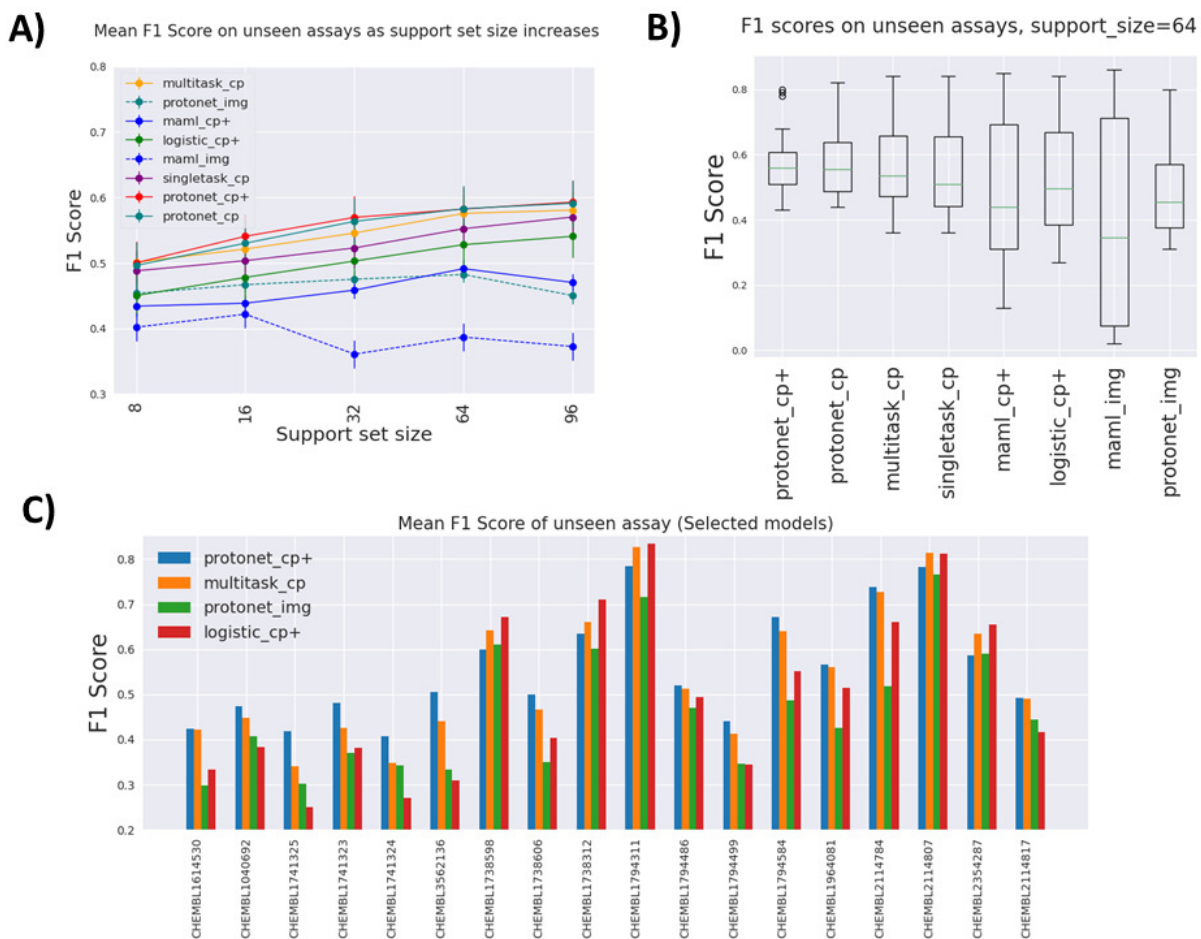

Figure 6: **Result reported using F1 Score.** Figure A): Mean F1 score on test tasks as support set size increases. Figure B): Distribution of F1 score across all test tasks at support set size 64. Figure C): Mean F1 score of selected models for each task across all support set sizes.

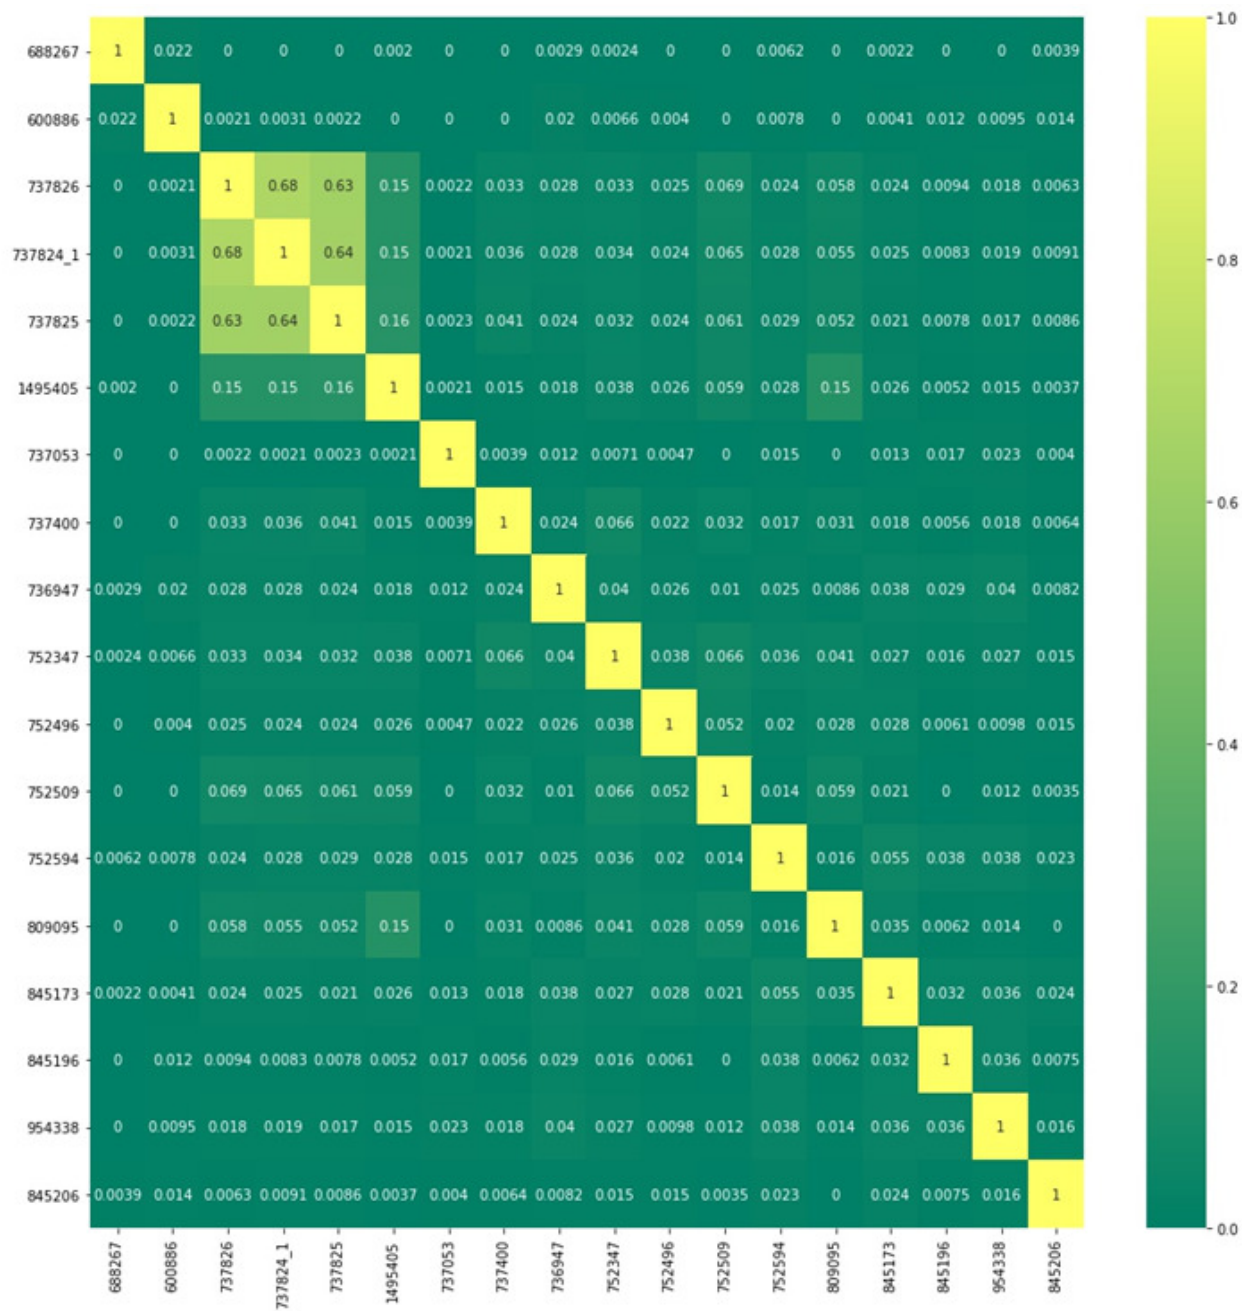

Figure 7: **Figure 1: Heatmap of Jaccard Index between the unique InChiKeys of 18 tasks in D\_test.** The majority of tasks share very few common InChiKeys. Outliers are tasks 737826, 737824\_1 and 737825 whose targets resemble Cytochrome P450. But we believe they are still different enough to be separate tasks in the test set.
